# Supplementary material for: An Ultra-Fast and Green LC-MS Method for Quantitative Analysis of Aesculin and Aesculetin in Cortex Fraxini
Source: MDPI journal article supplement (doi:10.3390/separations10090515), 2023-09-19
Supplement: s1 [file s1]

# Supplementary Material

**Table S1.** Recovery results of the developed liquid chromatography–mass spectrometry (LC–MS) method.

| Analytes   | Number | Original Amount<br>(mg) | Spiked Amount<br>(mg) | Found Amount<br>(mg) | Recovery<br>(%) | Average Recovery<br>(%) | RSD<br>(%) |
|------------|--------|-------------------------|-----------------------|----------------------|-----------------|-------------------------|------------|
| Aesculin   | 1      | 0.101                   | 0.0807                | 0.183                | 102             | 102                     | 1.34       |
|            | 2      | 0.0904                  | 0.0807                | 0.171                | 99.9            |                         |            |
|            | 3      | 0.0886                  | 0.0807                | 0.170                | 101             |                         |            |
|            | 4      | 0.0891                  | 0.0807                | 0.173                | 104             |                         |            |
|            | 5      | 0.0912                  | 0.0807                | 0.173                | 101             |                         |            |
|            | 6      | 0.0907                  | 0.0807                | 0.173                | 102             |                         |            |
| Aesculetin | 1      | 0.186                   | 0.151                 | 0.342                | 103             | 101                     | 2.47       |
|            | 2      | 0.166                   | 0.151                 | 0.318                | 101             |                         |            |
|            | 3      | 0.163                   | 0.151                 | 0.317                | 102             |                         |            |
|            | 4      | 0.163                   | 0.151                 | 0.316                | 101             |                         |            |
|            | 5      | 0.167                   | 0.151                 | 0.312                | 96.0            |                         |            |
|            | 6      | 0.166                   | 0.151                 | 0.319                | 101             |                         |            |

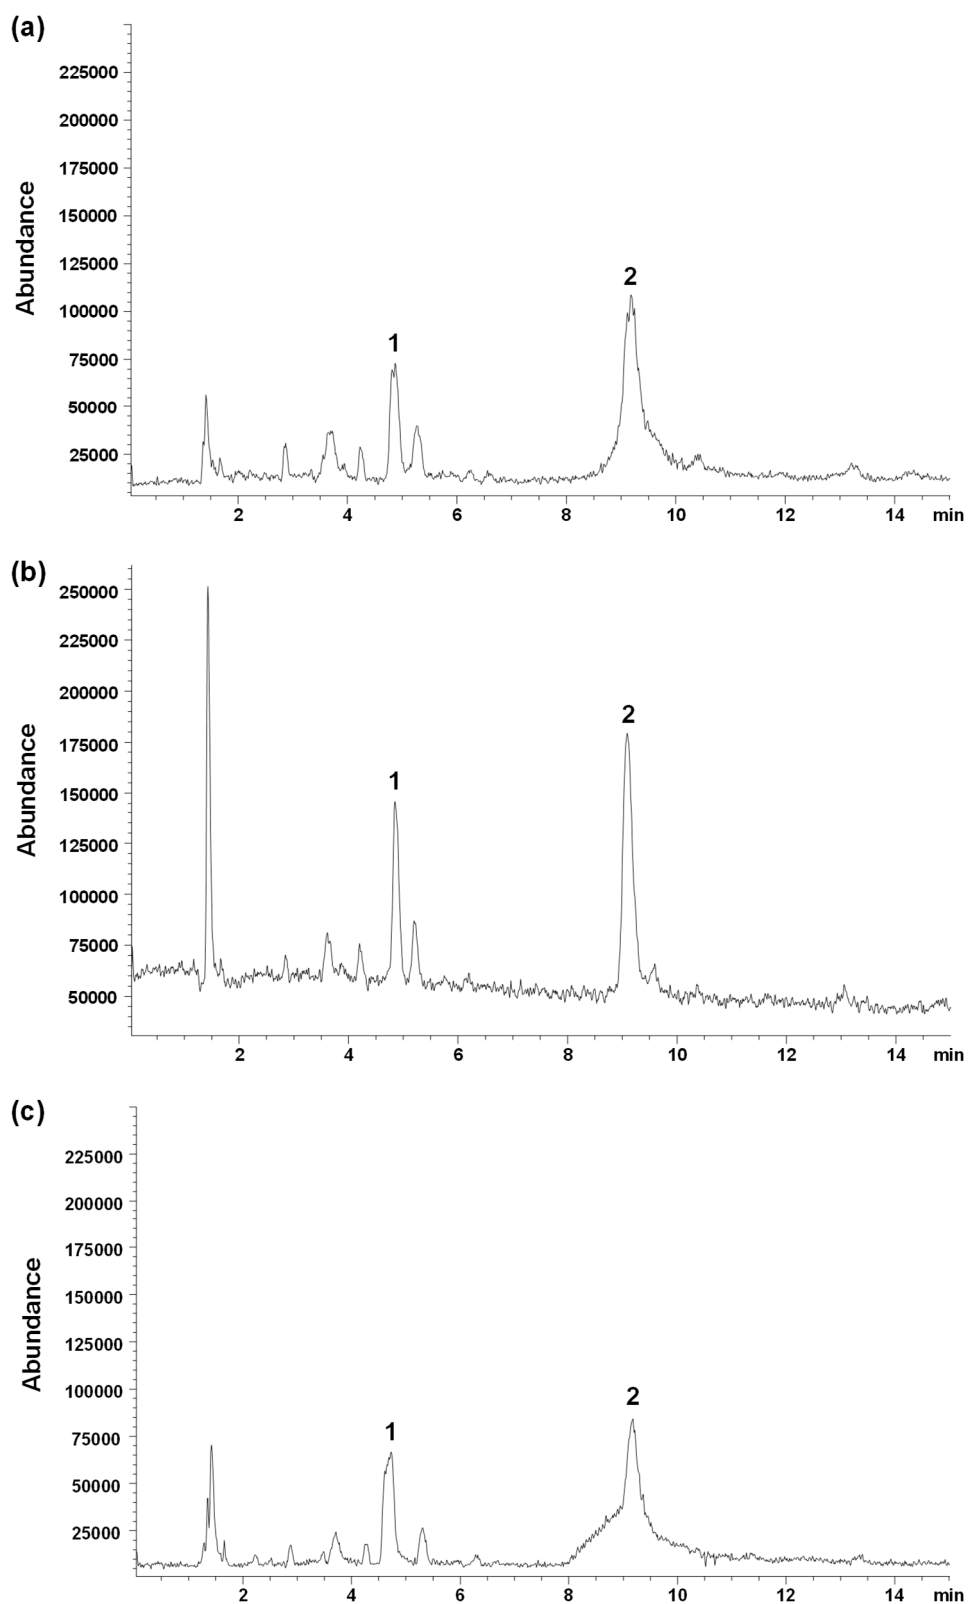

**Figure S1.** MS chromatograms of the mobile phase in water–acetonitrile (94:6, *v/v*) (a), 0.1% formic acid aqueous solution–acetonitrile (94:6, *v/v*) (b), and 1 mmol/L ammonium acetate–acetonitrile (94:6, *v/v*) (c) with identified peaks of aesculin (1) and aesculetin (2). LC separation conditions: Agilent InfinityLab Poroshell 120 EC-C<sub>18</sub> column (4.6 mm × 50 mm, 2.7 μm); column temperature, 40 °C; injection volume, 5 μL. MS detection mode: scan; scan range: 100–1000 *m/z*.

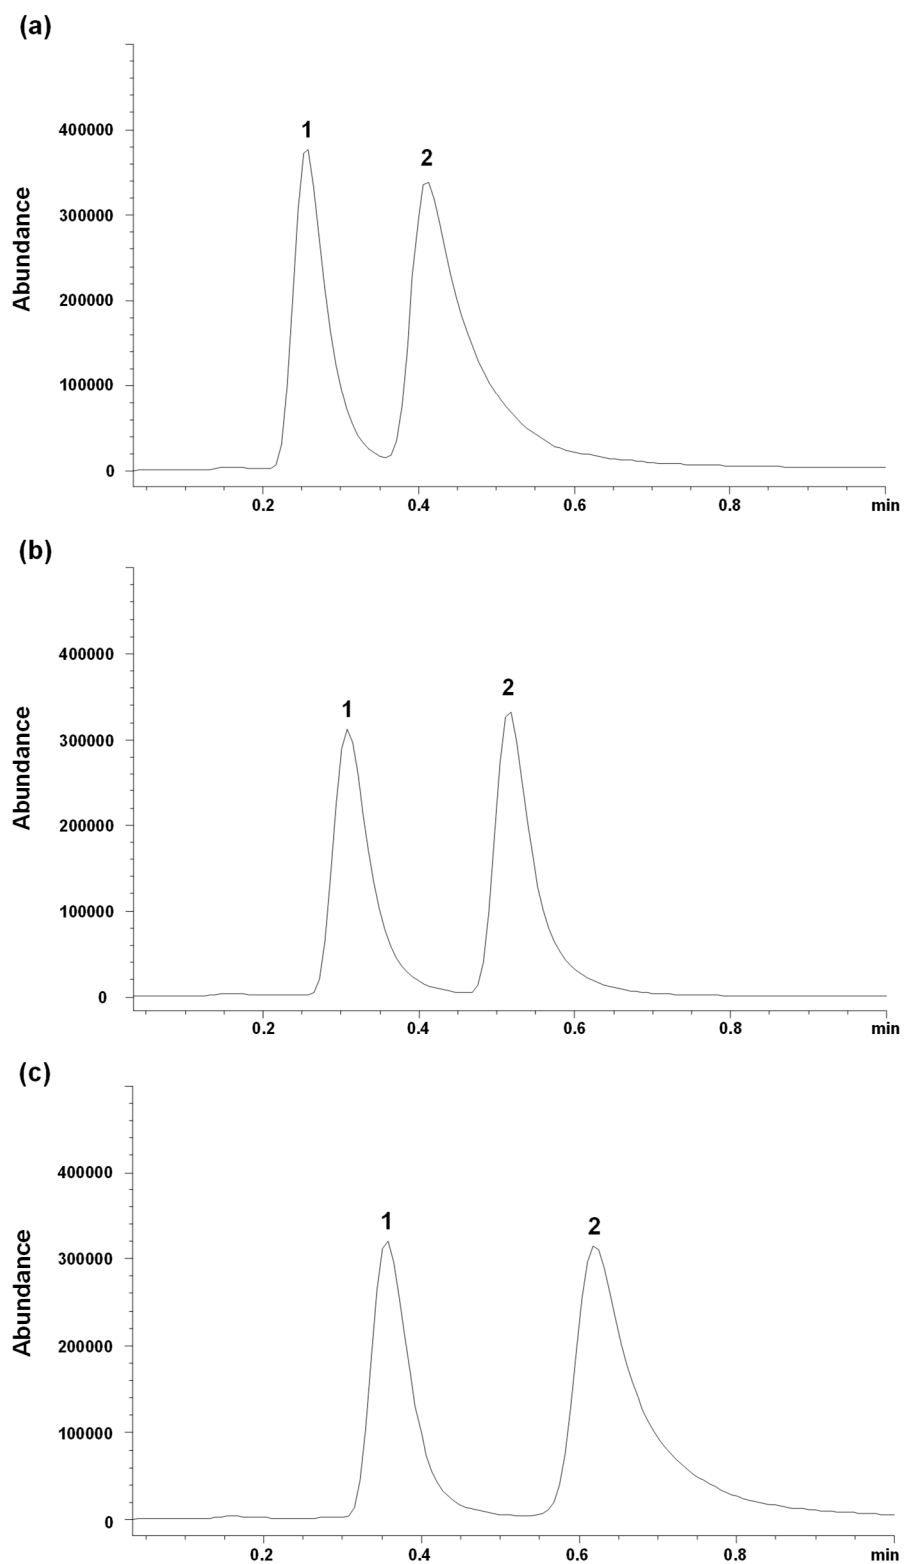

**Figure S2.** MS chromatograms of the mobile phase in 0.1% formic acid aqueous solution–acetonitrile (88:12, *v/v*) (a); 0.1% formic acid aqueous solution–acetonitrile (89:11, *v/v*) (b); 0.1% formic acid aqueous solution–acetonitrile (90:10, *v/v*) (c) with identified peaks of aesculin (1) and aesculetin (2). LC separation conditions: Agilent InfinityLab Poroshell 120 EC-C<sub>18</sub> (2.1 mm × 30 mm, 2.7 μm); column temperature, 40 °C;

injection volume, 1  $\mu\text{L}$ . MS detection mode: selected ion monitor; monitoring ions:  $m/z$  339 (aesculin) and  $m/z$  355 (aesculetin).

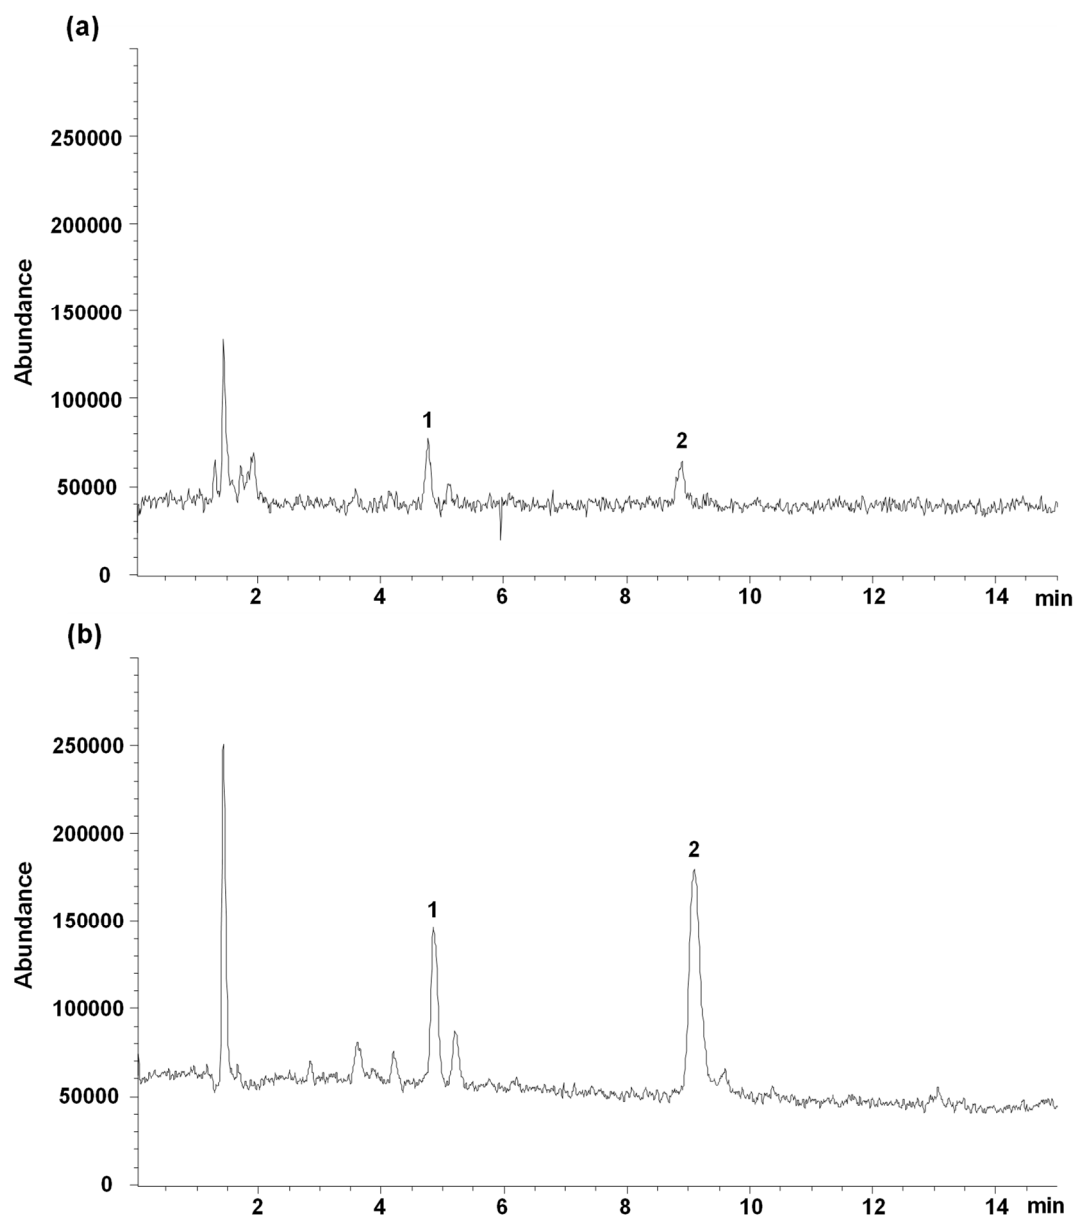

**Figure S3.** MS chromatograms of the sample extraction solution detected in the positive ion mode (a) and negative ion mode (b) with identified peaks of aesculin (1) and aesculetin (2). LC separation conditions: Agilent InfinityLab Poroshell 120 EC- $\text{C}_{18}$  column (4.6 mm  $\times$  50 mm, 2.7  $\mu\text{m}$ ); mobile phase, 0.1% formic acid aqueous solution–acetonitrile (94:6,  $v/v$ ); column temperature, 40  $^{\circ}\text{C}$ ; injection volume, 5  $\mu\text{L}$ . MS detection mode: scan; scan range: 100–1000  $m/z$ .

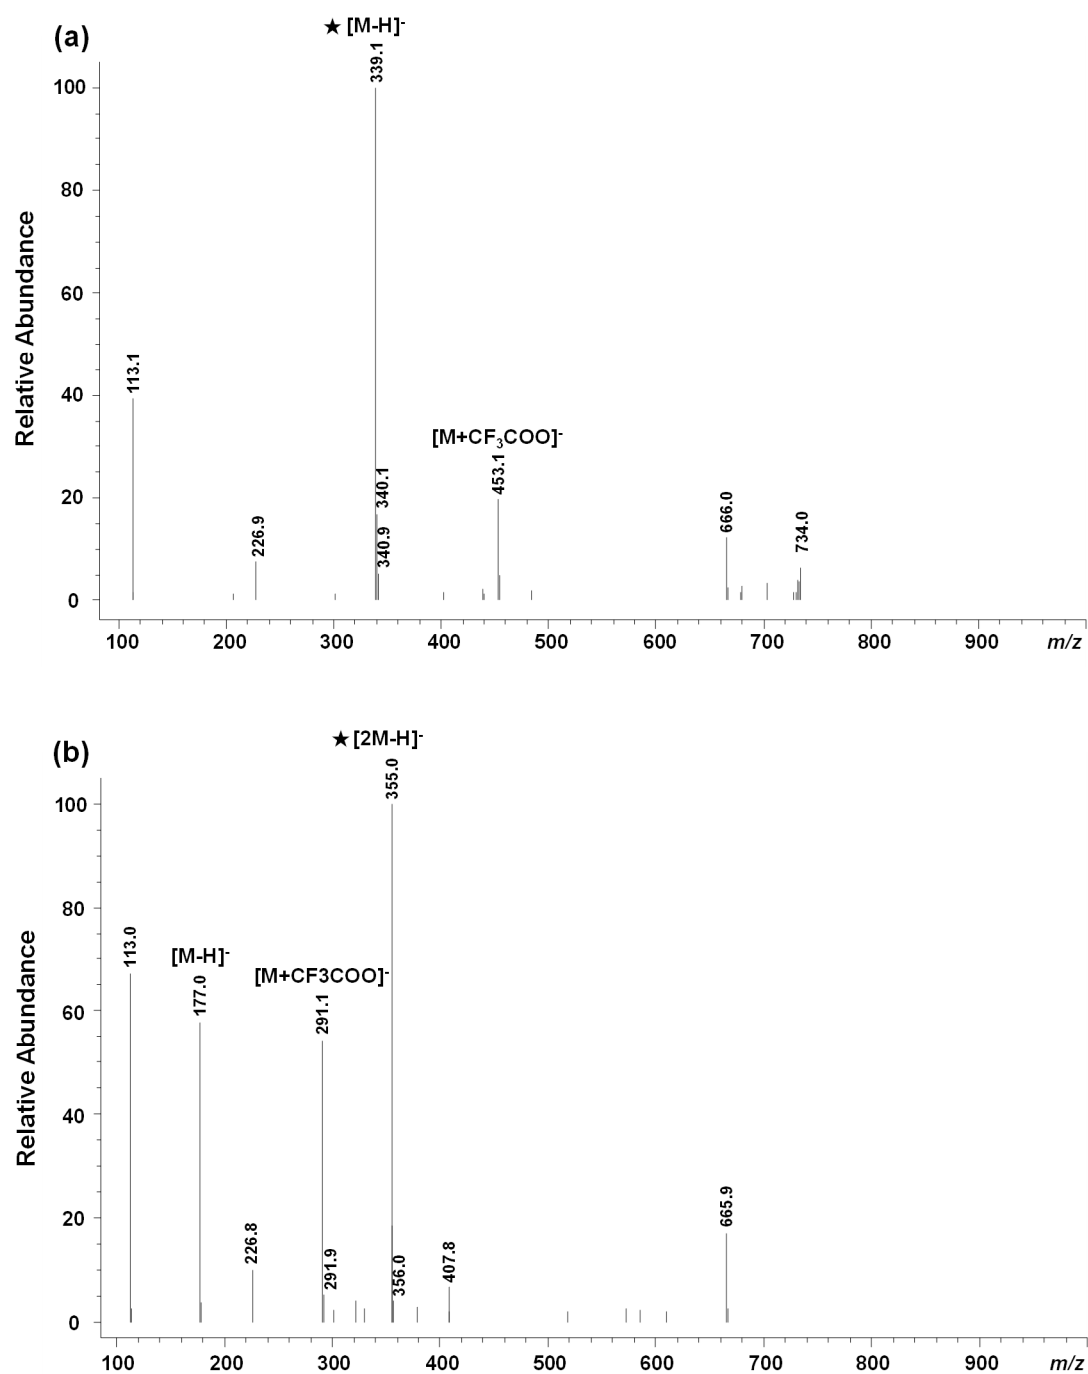

**Figure S4.** MS spectra of aesculin (a) and aesculetin (b) with selected  $m/z$  for the target component (★). LC separation conditions: Agilent InfinityLab Poroshell 120 EC- $C_{18}$  column (4.6 mm  $\times$  50 mm, 2.7  $\mu$ m); mobile phase, 0.1% formic acid aqueous solution–acetonitrile (94:6,  $v/v$ ); column temperature, 40  $^{\circ}$ C; injection volume, 5  $\mu$ L. MS detection mode: scan; scan range: 100–1000  $m/z$ .

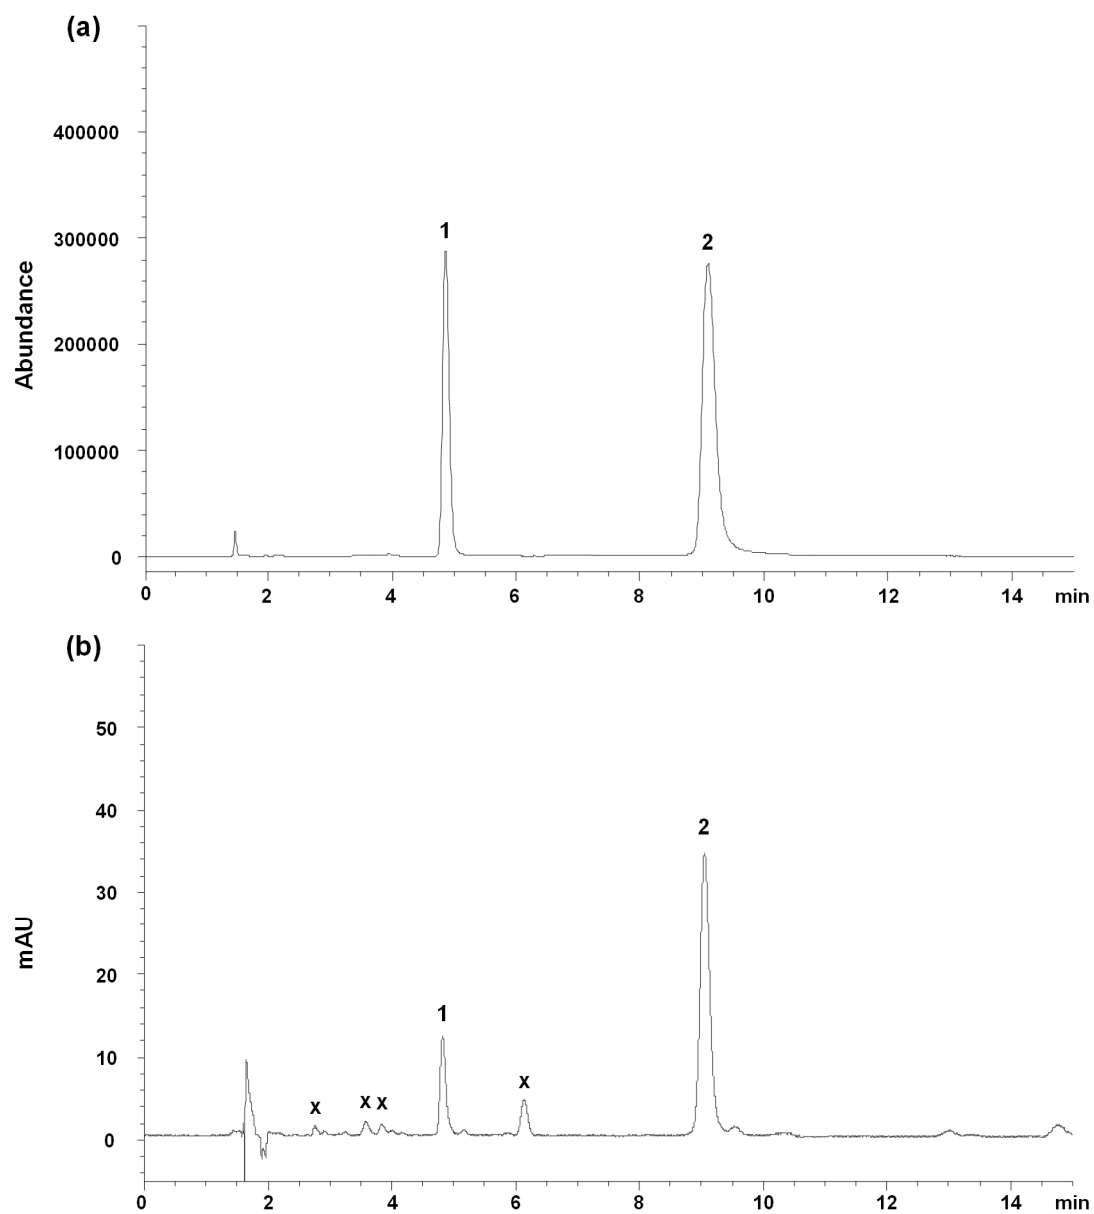

**Figure S5.** LC-MS (a) and LC-ultraviolet detection (b) chromatograms of sample extraction solution aesculin (1), aesculetin (2), and interference peak (x). LC separation conditions: Agilent InfinityLab Poroshell 120 EC-C<sub>18</sub> column (4.6 mm × 50 mm, 2.7 μm); mobile phase, 0.1% formic acid aqueous solution–acetonitrile (94:6, *v/v*); column temperature, 40 °C; injection volume, 5 μL. MS detection mode: selected ion monitor; monitoring ions: *m/z* 339 (aesculin) and *m/z* 355 (aesculetin). Ultraviolet detection conditions: detection wavelength, 236 nm.
